# LRP1 Regulates Architecture of the Vascular Wall by Controlling PDGFR $\beta$ -Dependent Phosphatidylinositol 3-Kinase Activation

Li Zhou<sup>1</sup>, Yoshiharu Takayama<sup>1</sup>, Philippe Boucher<sup>3</sup>, Michelle D. Tallquist<sup>2</sup>, Joachim Herz<sup>1\*</sup>

<sup>1</sup> Department of Molecular Genetics, UT Southwestern Medical Center, Dallas, Texas, United States of America, <sup>2</sup> Molecular Biology, UT Southwestern Medical Center, Dallas, Texas, United States of America, <sup>3</sup> Department of Pharmacology, University of Strasbourg, Strasbourg, France

## Abstract

**Background:** Low density lipoprotein receptor-related protein 1 (LRP1) protects against atherosclerosis by regulating the activation of platelet-derived growth factor receptor  $\beta$  (PDGFR $\beta$ ) in vascular smooth muscle cells (SMCs). Activated PDGFR $\beta$  undergoes tyrosine phosphorylation and subsequently interacts with various signaling molecules, including phosphatidylinositol 3-kinase (PI3K), which binds to the phosphorylated tyrosine 739/750 residues in mice, and thus regulates actin polymerization and cell movement.

**Methods and Principal Findings:** In this study, we found disorganized actin in the form of membrane ruffling and enhanced cell migration in LRP1-deficient (*LRP1*<sup>-/-</sup>) SMCs. Marfan syndrome-like phenotypes such as tortuous aortas, disrupted elastic layers and abnormally activated transforming growth factor  $\beta$  (TGF $\beta$ ) signaling are present in smooth muscle-specific LRP1 knockout (*smLRP1*<sup>-/-</sup>) mice. To investigate the role of LRP1-regulated PI3K activation by PDGFR $\beta$  in atherogenesis, we generated a strain of *smLRP1*<sup>-/-</sup> mice in which tyrosine 739/750 of the PDGFR $\beta$  had been mutated to phenylalanines (PDGFR $\beta$  F2/F2). Spontaneous atherosclerosis was significantly reduced in the absence of hypercholesterolemia in these mice compared to *smLRP1*<sup>-/-</sup> animals that express wild type PDGFR. Normal actin organization was restored and spontaneous SMC migration as well as PDGF-BB-induced chemotaxis was dramatically reduced, despite continued overactivation of TGF $\beta$  signaling, as indicated by high levels of nuclear phospho-Smad2.

**Conclusions and Significance:** Our data suggest that LRP1 regulates actin organization and cell migration by controlling PDGFR $\beta$ -dependent activation of PI3K. TGF $\beta$  activation alone is not sufficient for the expression of the Marfan-like vascular phenotype. Thus, regulation of PI3 Kinase by PDGFR $\beta$  is essential for maintaining vascular integrity, and for the prevention of atherosclerosis as well as Marfan syndrome.

**Citation:** Zhou L, Takayama Y, Boucher P, Tallquist MD, Herz J (2009) LRP1 Regulates Architecture of the Vascular Wall by Controlling PDGFR $\beta$ -Dependent Phosphatidylinositol 3-Kinase Activation. PLoS ONE 4(9): e6922. doi:10.1371/journal.pone.0006922

**Editor:** Harald HHW Schmidt, Monash University, Australia

**Received:** May 19, 2009; **Accepted:** August 7, 2009; **Published:** September 9, 2009

**Copyright:** © 2009 Zhou et al. This is an open-access article distributed under the terms of the Creative Commons Attribution License, which permits unrestricted use, distribution, and reproduction in any medium, provided the original author and source are credited.

**Funding:** This study was supported by grants from NIH (HL20948, HL63762, and NS43408), the Alzheimer's Association, the Humboldt Foundation and the Perot Family Foundation for J.H., by NIH (HL074257) and American Heart Association (AHA) Scientific Development Grant (0330351) to M.D.T., and by a Postdoctoral Fellowship (Grant 0825316F) from the South Central Affiliate of the AHA to L.Z.. The funders had no role in study design, data collection and analysis, decision to publish, or preparation of the manuscript.

**Competing Interests:** The authors have declared that no competing interests exist.

\* E-mail: joachim.herz@utsouthwestern.edu

## Introduction

Low density lipoprotein receptor related protein 1 (LRP1) is a multifunctional member of the LDL receptor (LDLR) gene family with a unique capacity of binding over 40 distinct ligands [1]. It plays diverse roles in a variety of biological processes including lipoprotein metabolism, protease degradation, activation of lysosomal enzymes, and endocytosis of bacterial toxins and viruses [1,2]. Binding of apolipoprotein E (apoE) to the extracellular domain of LRP1 removes apoE-containing lipoprotein remnants from the circulation into the liver by endocytosis [3,4,5]. By contrast, in the smooth muscle cells (SMCs) of the arterial wall, apoE-lipoprotein binding inhibits platelet-derived growth factor (PDGF)-directed SMC migration [6]. Studies from our laboratory have shown that LRP1 suppresses PDGF receptor  $\beta$  (PDGFR $\beta$ ) activation and protects against atherosclerosis [7].

Activated PDGFR $\beta$  undergoes tyrosine phosphorylation and subsequently interacts with a variety of SH2 domain-containing signaling molecules including phosphatidylinositol 3-kinase (PI3K), phospholipase C $\gamma$  (PLC $\gamma$ ), Src family kinase, and phosphotyrosine phosphatase SHP-2 [8]. Among these interacting proteins, PI3K which binds to the phosphorylated tyrosine 740/751 residues (739/750 in the mouse) of PDGFR $\beta$  through its p85 regulatory subunit [9], is particularly important for regulating actin organization [10,11], cell growth and migration [12].

LRP1 is also known as transforming growth factor  $\beta$  (TGF $\beta$ ) receptor V (T $\beta$ R-V) and appears to be required for mediating the growth inhibitory response of TGF $\beta$ , in conjunction with Smad signaling through T $\beta$ R-II and I [13,14]. TGF $\beta$  signaling is abnormally elevated in the absence of LRP1 *in vivo*, where analysis of SMC-specific LRP1 knockout (*smLRP1*<sup>-/-</sup>) mice revealed a Marfan syndrome-like phenotype with nuclear accumulation of

phosphorylated Smad2 (p-Smad2) and disruption of elastic layers in the vessel wall [15].

For the present study we have generated a new, genetically complex strain of compound mutant mice that are LDL receptor-deficient (LDLR<sup>-/-</sup>), lack LRP1 only in their vascular smooth muscle cells, and express an endogenous, crippled form of the PDGFR $\beta$  that is incapable of activating PI3K. Our goal was to test, whether increased PDGFR $\beta$  signaling through PI3K is the primary cause for the increased susceptibility to atherosclerotic lesion development in LDLR<sup>-/-</sup> mice lacking LRP1 in their SMCs, and whether PDGFR $\beta$ -dependent PI3K signaling is required for the expression of the Marfan syndrome-like phenotype in smLRP1-deficient mice.

## Results

### Lack of LRP1 expression in the SMCs results in cell hypertrophy and vessel elongation

Earlier data from our laboratory showed that smLRP1<sup>-/-</sup>; LDLR<sup>-/-</sup> mice are highly susceptible to atherosclerosis when fed a high-cholesterol diet [7]. To determine if this increased susceptibility to atherosclerosis is preserved in smLRP1<sup>-/-</sup> mice in the absence of hypercholesterolemia, smLRP1<sup>-/-</sup> mice either expressing or lacking LDLR were maintained on a standard low-fat rodent chow. Determination of plasma total cholesterol confirmed that smLRP1<sup>-/-</sup> mice did not develop hypercholesterolemia (129.9 $\pm$ 5.3 mg/dl, Table 1). Whereas, smLRP1<sup>-/-</sup>; LDLR<sup>-/-</sup> mice had high total cholesterol levels of 246.5 $\pm$ 61.0 mg/dl with a major increase in LDL (Figure S1).

Elongated aortas were present in the absence of hypercholesterolemia in smLRP1<sup>-/-</sup> mice (Figure 1c, h). However, atherosclerotic lesions were only visible in smLRP1<sup>-/-</sup>; LDLR<sup>-/-</sup> mice (Figure 1e, j). To study structural changes in the vascular wall of these elongated aortas, H&E, trichrome and elastin staining were performed. Thickened aortic walls with intima thickening, disarranged and hypertrophic SMCs, increased extracellular collagen accumulation, and elastic lamina disruption were observed in 11-month old smLRP1<sup>-/-</sup> mice (Figure 1B). Vascular wall thickening was also present in young mice at 7 weeks of age (Figure S2). Compared with wild type, the aortic wall of smLRP1<sup>-/-</sup> mice was significantly thicker (66.14 $\pm$ 3.32  $\mu$ m vs. 39.35 $\pm$ 2.16  $\mu$ m, Figure 1C). Our findings indicate that LRP1 expression in SMCs controls the architecture of the vascular wall in a plasma cholesterol-independent manner.

**Table 1.** Total cholesterol and triglyceride levels of mouse plasma.

|                            | WT               | smLRP1 <sup>-/-</sup>        | LDLR <sup>-/-</sup>           | smLRP1 <sup>-/-</sup> ,<br>LDLR <sup>-/-</sup> |
|----------------------------|------------------|------------------------------|-------------------------------|------------------------------------------------|
| <b>Total Cholesterol</b>   | 131.3 $\pm$ 16.8 | 129.9 $\pm$ 5.3 <sup>a</sup> | 294.2 $\pm$ 17.7 <sup>b</sup> | 246.5 $\pm$ 61.0 <sup>cd</sup>                 |
| <b>Total Triglycerides</b> | 61.7 $\pm$ 9.8   | 51.1 $\pm$ 20.0 <sup>a</sup> | 125.0 $\pm$ 42.9 <sup>b</sup> | 101.1 $\pm$ 28.4 <sup>cd</sup>                 |

Total cholesterol and triglyceride levels were significantly higher in mice lacking LDLR, even though they were fed a standard rodent chow diet. LRP-deficient in smooth muscle cells did not change the lipid levels significantly.

<sup>a</sup>*p*>0.05 (smLRP1<sup>-/-</sup> vs WT).

<sup>b</sup>*p*<0.01 (LDLR<sup>-/-</sup> vs WT).

<sup>c</sup>*p*<0.05 (smLRP1<sup>-/-</sup>; LDLR<sup>-/-</sup> vs smLRP1<sup>-/-</sup>).

<sup>d</sup>*p*>0.05 (smLRP1<sup>-/-</sup>; LDLR<sup>-/-</sup> vs LDLR<sup>-/-</sup>).

doi:10.1371/journal.pone.0006922.t001

### LRP1 controls PI3K binding and activation by PDGFR $\beta$ *in vivo*

PDGFR $\beta$  signaling is crucial for regulating SMC responses and is an important contributing factor to atherogenesis. Previous work from our laboratory showed dramatically increased expression and activation of PDGFR $\beta$  in aortas from smLRP1<sup>-/-</sup>; LDLR<sup>-/-</sup> mice on a high-cholesterol diet [7]. To investigate the basal expression and activation level of PDGFR $\beta$  in mice maintained on a low-cholesterol diet, aortic extracts were prepared from mice expressing or lacking LRP1 and LDLR and analyzed by Western blotting. Because PDGFR $\beta$  activation, through transphosphorylation of tyrosine residues in its cytoplasmic domain, triggers a cascade of phosphorylation events which eventually lead to the activation of extracellular regulated-protein kinases (Erks), phosphorylated-Erk1/2 was used as an indicator of PDGFR $\beta$  activation [7]. About a two-fold increase of PDGFR $\beta$  expression was detected in smLRP1<sup>-/-</sup> mice regardless of LDLR genotype (Figure 2A, C). Increased Erk1/2 phosphorylation was also observed in these aortas (Figure 2A). These data suggest that the expression and activation of PDGFR $\beta$  is only regulated by LRP1, not LDLR.

PI3K binding sites on PDGFR $\beta$  are crucial for the receptor-mediated cell responses [16,17]. To explore the functional and biochemical interaction between LRP1 and the PDGFR $\beta$ -PI3K signaling pathway, we performed a co-immunoprecipitation assay. Compared to wild type animals, smLRP1<sup>-/-</sup> mice showed increased tyrosine-phosphorylation of and PI3K binding to PDGFR $\beta$  (Figure 2B), indicating that LRP1 regulates PDGFR $\beta$ -dependent activation of PI3K by controlling PDGFR $\beta$  phosphorylation.

### Disruption of PDGFR $\beta$ -PI3K signaling in mice reduces atherosclerosis

To investigate whether LRP1 regulates atherosclerosis through the PDGFR $\beta$ -dependent PI3K pathway *in vivo*, we generated a compound mutant mouse model by crossing smLRP1<sup>-/-</sup>; LDLR<sup>-/-</sup> mice to PI3K binding-deficient PDGFR $\beta$  F2/F2 mutant mice, in which tyrosine residues at position 739 and 750 are mutated to phenylalanines [18].

We found significantly decreased atherosclerotic lesions in the aortic arch and abdominal aorta of smLRP1<sup>-/-</sup>; LDLR<sup>-/-</sup>; PDGFR $\beta$  F2/F2 mice (Figure 3A, C). H&E, trichrome and elastin staining revealed well-arranged spindle-shaped SMCs, reduced extracellular matrix, and virtually normal elastic layers in smLRP1<sup>-/-</sup>; LDLR<sup>-/-</sup>; PDGFR $\beta$  F2/F2 aortas (Figure 3B). Vascular wall thickness, hypercellularity and length of the aortas in smLRP1<sup>-/-</sup>; LDLR<sup>-/-</sup>; PDGFR $\beta$  F2/F2 mutants were markedly reduced to approximately normal levels (Figure 3B, D, E, F). However, the prominent aneurysms of the mesenteric arteries, which are a hallmark of smLRP1<sup>-/-</sup> mice, were notably not abolished in smLRP1<sup>-/-</sup>; LDLR<sup>-/-</sup>; PDGFR $\beta$  F2/F2 mice (Figure 3A), suggesting that atherogenesis and aneurysm formation employ at least partially different molecular or regionally distinct mechanisms.

### Ablation of PI3K binding to PDGFR $\beta$ reverses actin disorganization in LRP1-deficient SMCs

To characterize SMCs lacking either LRP1 or LDLR and with crippled PI3K binding to PDGFR $\beta$  *in vitro*, we generated primary cells from the aortas of these mice. To eliminate fibroblast contamination, LRP1-deficient SMCs were selected with *Pseudomonas* exotoxin A (PEA) according to previous publications [19,20]. Primary SMCs were identified by their typical spindle

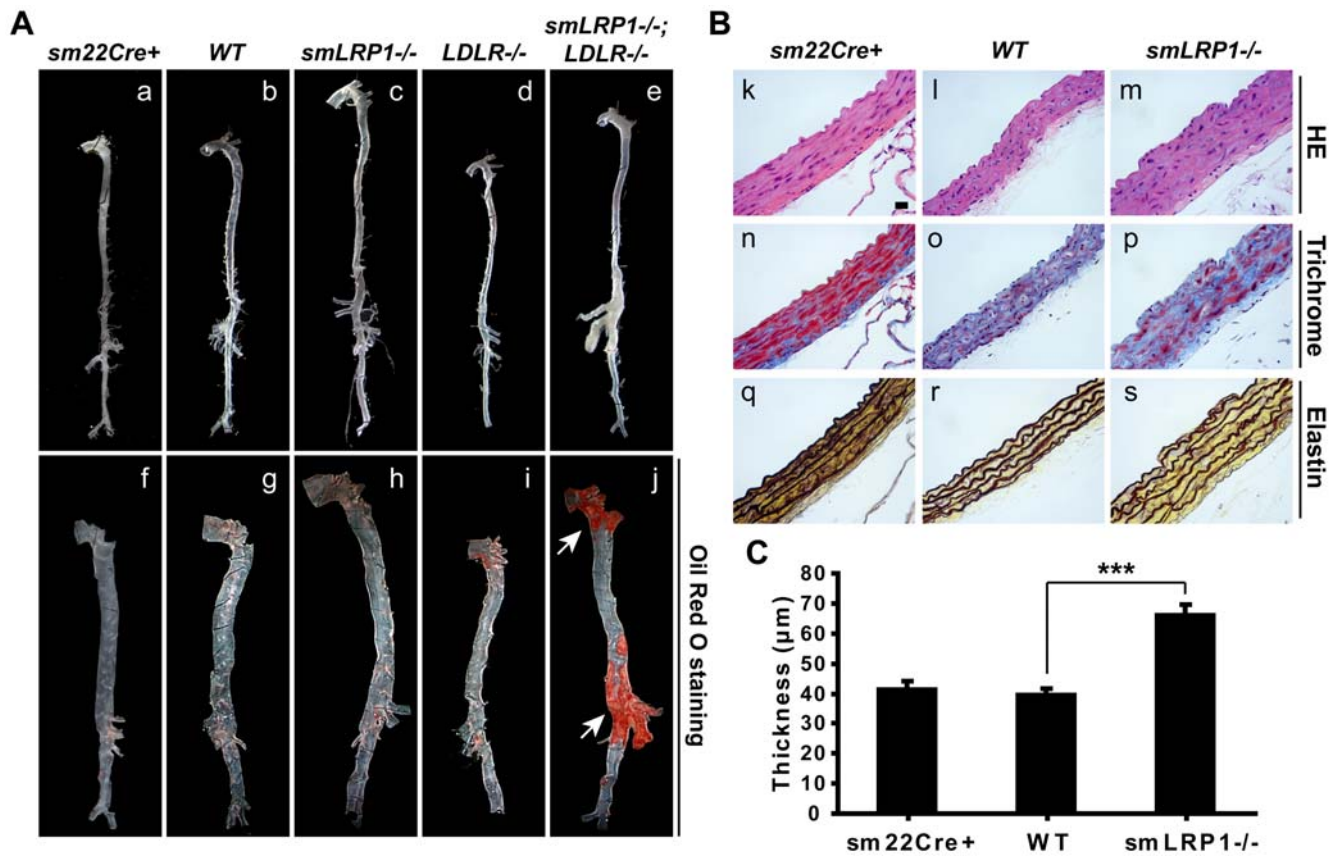

**Figure 1. Hypertrophic and hyperplastic SMCs and elongated aortas in *smLRP1*<sup>-/-</sup> mice.** (A) Unopened (a–e) and Oil Red O stained (f–j) aortas from 11-month old mice of the indicated genotypes. Mice were maintained on standard rodent chow diet. Arrows indicate lipid-laden atherosclerotic lesions. (B) Histological analysis of thoracic aortas from 11-month old mice of the indicated genotypes. k–m: hematoxylin & eosin (HE); n–p: trichrome; q–s: elastin staining. Scale bar, 20 μm. (C) Thickness of the aortas of the indicated genotypes was quantified using Image J software (NIH). Data represent mean ± SD from 3 mice per group. \*\*\*  $p < 0.001$ . doi:10.1371/journal.pone.0006922.g001

shape (Figure 4a) and the expression of smooth muscle actin (Figure 4b). LRP1 expression was verified by both immunocytochemical staining (Figure 4c, d) and Western blotting (Figure 4e). Interestingly, the morphology of SMCs of different genotypes looked quite distinct from each other. Actin organization was disrupted in the SMCs lacking LRP1 expression and an “actin ring” was present below the plasma membrane (Figure 4B). However, in *smLRP1*<sup>-/-</sup>; *PDGFRβ* *F2/F2* SMCs actin organization was restored (Figure 4B), suggesting that LRP1 mediates actin remodeling through PI3K activation upon PDGFRβ phosphorylation.

#### Increased migration of LRP1-deficient SMCs is diminished by the PDGFRβ F2 mutation

Our *in vivo* experiments showed disarranged SMCs in the medial layer of the aorta (Figure 1m, 3h, 3k) and disrupted elastic laminae when LRP1 was deficient in the SMCs (Figure 1s, 3t, 3w). To investigate if these phenomena are caused by abnormal migration due to the absence of LRP1, we performed two different kinds of *in vitro* migration assays. Compared with wild type cells, SMCs lacking LRP1 showed markedly increased migratory activity, both in a Boyden chamber transmigration assay (Figure 5A, C) and in the commonly used scratch assay, in which the migration of the cells into a denuded area of a tissue culture dish is quantified (Figure 5B, D). Cell migration was significantly reduced in those cells containing the *PDGFRβ* *F2/F2* mutation

(Figure 5A–D), and this correlated with the improved architecture of the elastic layers in the aortic wall of *smLRP1*<sup>-/-</sup>; *LDLR*<sup>-/-</sup>; *PDGFRβ* *F2/F2* mice (Figure 3u, x). These findings thus confirm that SMC migration is regulated by LRP1 through the PDGFRβ-dependent PI3K pathway.

#### PDGF-BB-induced chemotaxis is inhibited by blocking PI3K activation through PDGFRβ

To investigate whether PDGF-BB-induced SMC migration involves the PDGFRβ-PI3K pathway, 10 ng/ml PDGF-BB was administered as a chemo-attractant in the bottom well of a Boyden chamber. As shown in Figure 5E, PDGF-BB induced the transmigration of SMCs independent of LRP1 expression. However, when the Y739/750 phosphorylation sites of PDGFRβ were mutated, this PDGF-BB-induced chemotaxis was completely abolished. This finding suggests that the increased migratory propensity of LRP1-deficient SMCs, which is further enhanced by PDGF-BB activation of PDGFRβ, is in its entirety dependent upon the activation of PI3K by PDGFRβ.

#### Abnormal activation of TGFβ signaling is present in the absence of LRP1

Our *in vivo* findings indicate that lack of LRP1 in SMCs results in elongation of the aorta, thickening of the vascular wall, and disruption of the elastic layers. Tortuous aorta and elastic laminae disruption are also two key cardiovascular manifestations



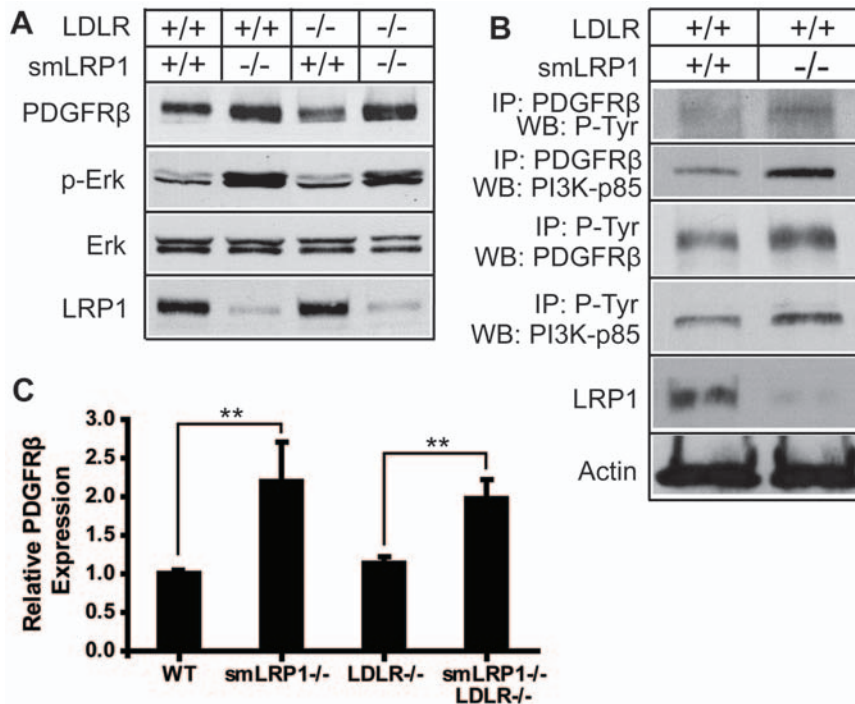

**Figure 2. Increased expression and activation of PDGFR $\beta$  and PI3K binding by PDGFR $\beta$  in aortic extracts of *smLRP1*<sup>-/-</sup> mice.** (A) Protein extracts (10  $\mu$ g/lane) from mouse aortas of the indicated genotypes were analyzed by immunoblotting for PDGFR $\beta$ , p-Erk1/2, Erk1/2, and LRP1. (B) 200  $\mu$ g of aortic extracts of the indicated genotypes were immunoprecipitated with the designated antibodies (anti-PDGFR $\beta$  and anti-phosphotyrosine) to semi-quantitatively determine the interaction between PI3K and PDGFR $\beta$ . Precipitated proteins were analyzed by immunoblotting using the indicated antibodies (anti-phosphotyrosine, anti-PI3K-p85 and anti-PDGFR $\beta$ ). Actin served as a loading control. WB: Western blot; IP: immunoprecipitation. (C) Expression of PDGFR $\beta$  relative to the loading control was quantified using Image J software (NIH). Data are expressed as mean  $\pm$  SD. \*\*  $p < 0.01$ .

doi:10.1371/journal.pone.0006922.g002

of Marfan syndrome. As a connective tissue disorder with autosomal dominant inheritance, Marfan syndrome is caused by loss-of-function mutations in fibrillin-1, a matrix component of extracellular microfibrils [21]. Fibrillin-1 regulates activation of the cytokine TGF $\beta$ , and its deficiency results in enhanced TGF $\beta$  signaling [22,23]. Recent studies have shown that abnormal activation of TGF $\beta$  contributes to the pathogenesis of Marfan syndrome [22]. Paradoxically, loss of function mutations in TGF $\beta$  receptor I or II also result in increased TGF $\beta$  signaling and give rise to Marfan syndrome [24,25]. LRP1 is identical to the type V TGF $\beta$  receptor (T $\beta$ R-V), which co-expresses with other TGF $\beta$  receptors (T $\beta$ R-I, T $\beta$ R-II and T $\beta$ R-III) [13]. LRP1/T $\beta$ R-V mediates TGF $\beta$  induced growth inhibition in concert with T $\beta$ R-II/T $\beta$ R-I/Smad2/3/4 signaling [13,14] and TGF $\beta$  signaling is increased in LRP1 deficient mouse aortas [15].

To evaluate the TGF $\beta$  activation state in the aortas of the different genotypes, immunofluorescent staining and Western blotting of p-Smad2 were performed. Significantly increased Smad2 nuclear translocation was seen in *smLRP1*<sup>-/-</sup>; *LDLR*<sup>-/-</sup> aortas. Importantly, blockade of PI3K binding to PDGFR $\beta$  did not suppress over-activation of TGF $\beta$  signaling (Figure 6A). An approximately 2.5-fold increase of Smad2 phosphorylation at Ser 465/467 was also detected in *LDLR*-expressing, LRP1-deficient SMCs (Figure 6B, C). These data indicate that in the absence of LRP1, TGF $\beta$  signaling is abnormally activated independent of the absence or presence of the LDL receptor, and this over-activation of TGF $\beta$  is not suppressed by the PDGFR $\beta$  F2 mutation.

Taken together, our findings suggest that aorta elongation and elastic layer disruption, both hallmarks of Marfan syndrome,

require the PDGFR $\beta$  dependent activation of PI3K. Activation of the TGF $\beta$  signaling pathway alone is not sufficient. Thus, LRP1 acts as a molecular switch that integrates TGF $\beta$  and PDGFR $\beta$ /PI3K signals and this is essential for maintaining the integrity of the vascular wall architecture.

## Discussion

In this study we have investigated the role of LRP1 for PI3K activation by PDGFR $\beta$  in SMCs, and the impact this LRP1 'checkpoint' has for preventing atherosclerotic lesion formation and progression, as well as for the maintenance of vascular wall integrity. We found that the selective genetic blockade of PI3K activation by PDGFR $\beta$  substantially suppressed spontaneous atherosclerotic lesion development, which is prominent in *smLRP1*<sup>-/-</sup>; *LDLR*<sup>-/-</sup> mice. Furthermore, vascular wall elongation and medial thickening, due to SMC hyperproliferation, increased SMC migration and disruption of elastic layers are normalized throughout the entire aorta. Our findings suggest that PI3K is the main driving force that promotes SMC proliferation and migration, elastolysis, spontaneous atherosclerosis and lesion progression in the absence of LRP1.

Prominent atherosclerotic lesions preexisted in *smLRP1*<sup>-/-</sup>; *LDLR*<sup>-/-</sup> mice maintained on standard, low-fat and cholesterol-free rodent chow, but not in *smLRP1*<sup>-/-</sup> animals of comparable age. These data suggest that in the presence of an intact endothelium and low plasma cholesterol levels, proliferative signals alone are not sufficient to initiate the pathogenic mechanisms that culminate in classic atherosclerotic plaques. By contrast, the aorta of *LRP1*<sup>+/+</sup>; *LDLR*<sup>-/-</sup> mice appears

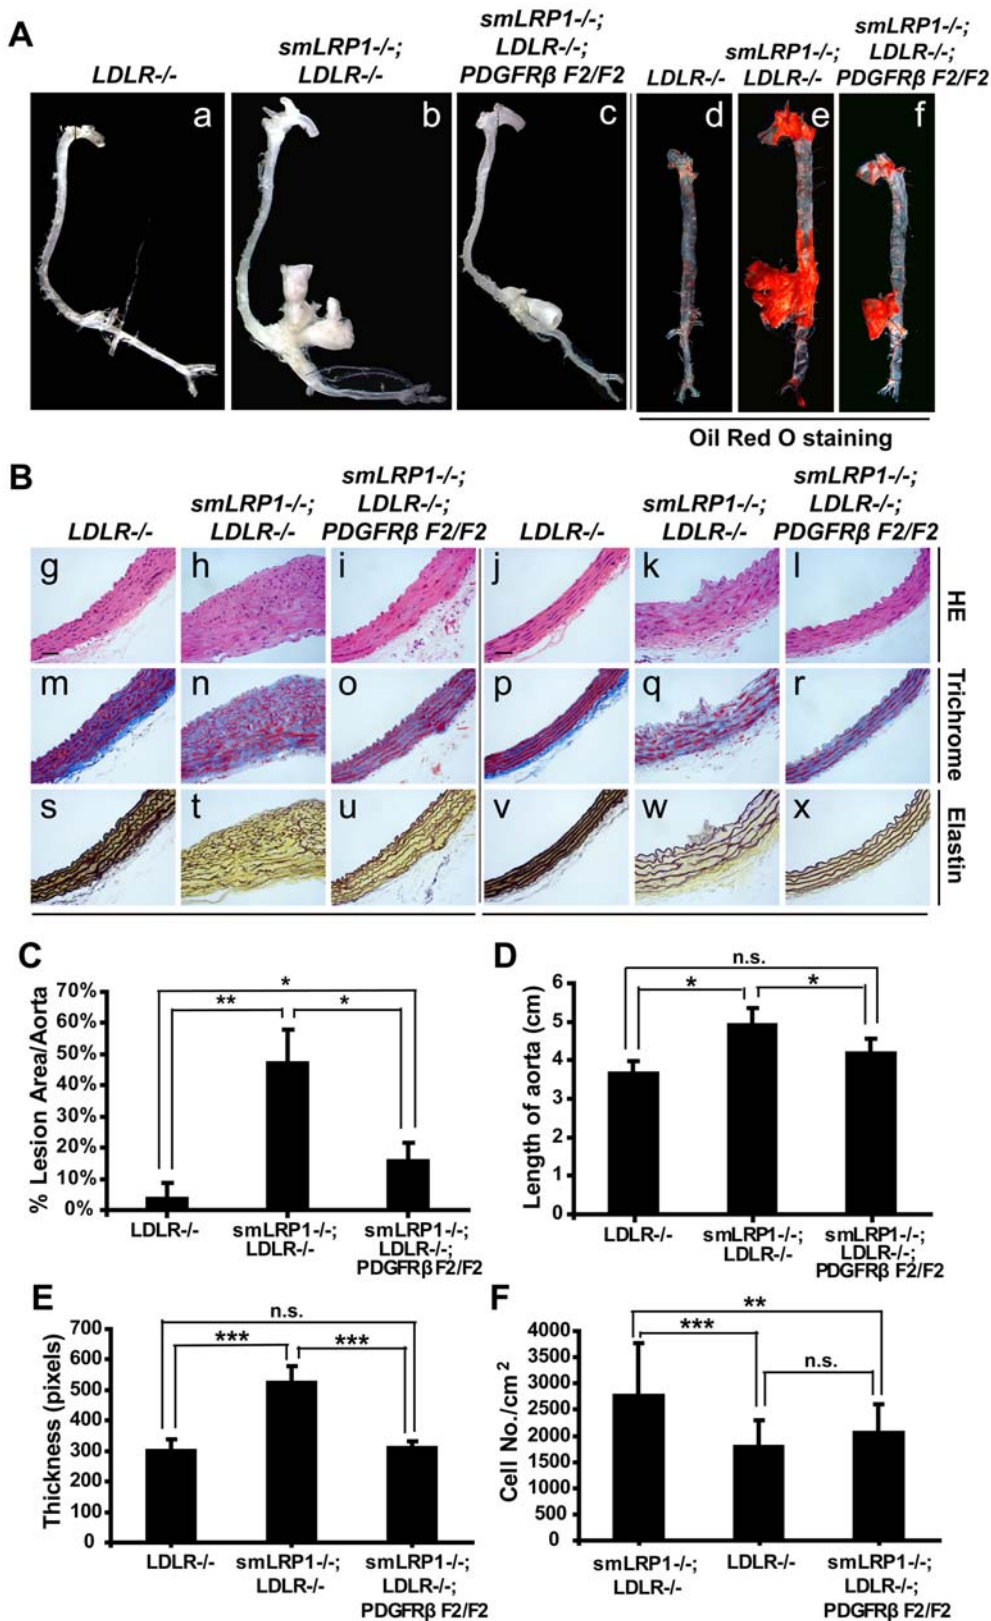

**Figure 3. Reduced atherosclerotic lesions in *smLRP1*<sup>-/-</sup>; *LDLR*<sup>-/-</sup>; *PDGFRβ* F2/F2 mutant mice.** (A) Unopened (a–c) & Oil Red O stained (d–f) aortas from 10-month old mice of the indicated genotypes. Mice were maintained on standard rodent chow diet. Arrows indicate lipid-laden atherosclerotic lesions. (B) Histological analysis of aortas from 8-month old mice of the indicated genotypes. g–l: HE stain, m–r: trichrome stain, s–x: elastin stain. g,h,i,m,n,o,s,t u: aortic arch; j,k,l,p,q,r,v,w,x: thoracic aorta. Scale bar, 20 μm. (C, D, E, F) Atherosclerotic lesions (C), length (D), thickness (E) and cell number per cm<sup>2</sup> (F) of the indicated genotypes were quantified using Image J software (NIH). Results from 3 mice per group are presented as mean±SD. \* *p*<0.05, \*\* *p*<0.01, \*\*\* *p*<0.001. doi:10.1371/journal.pone.0006922.g003

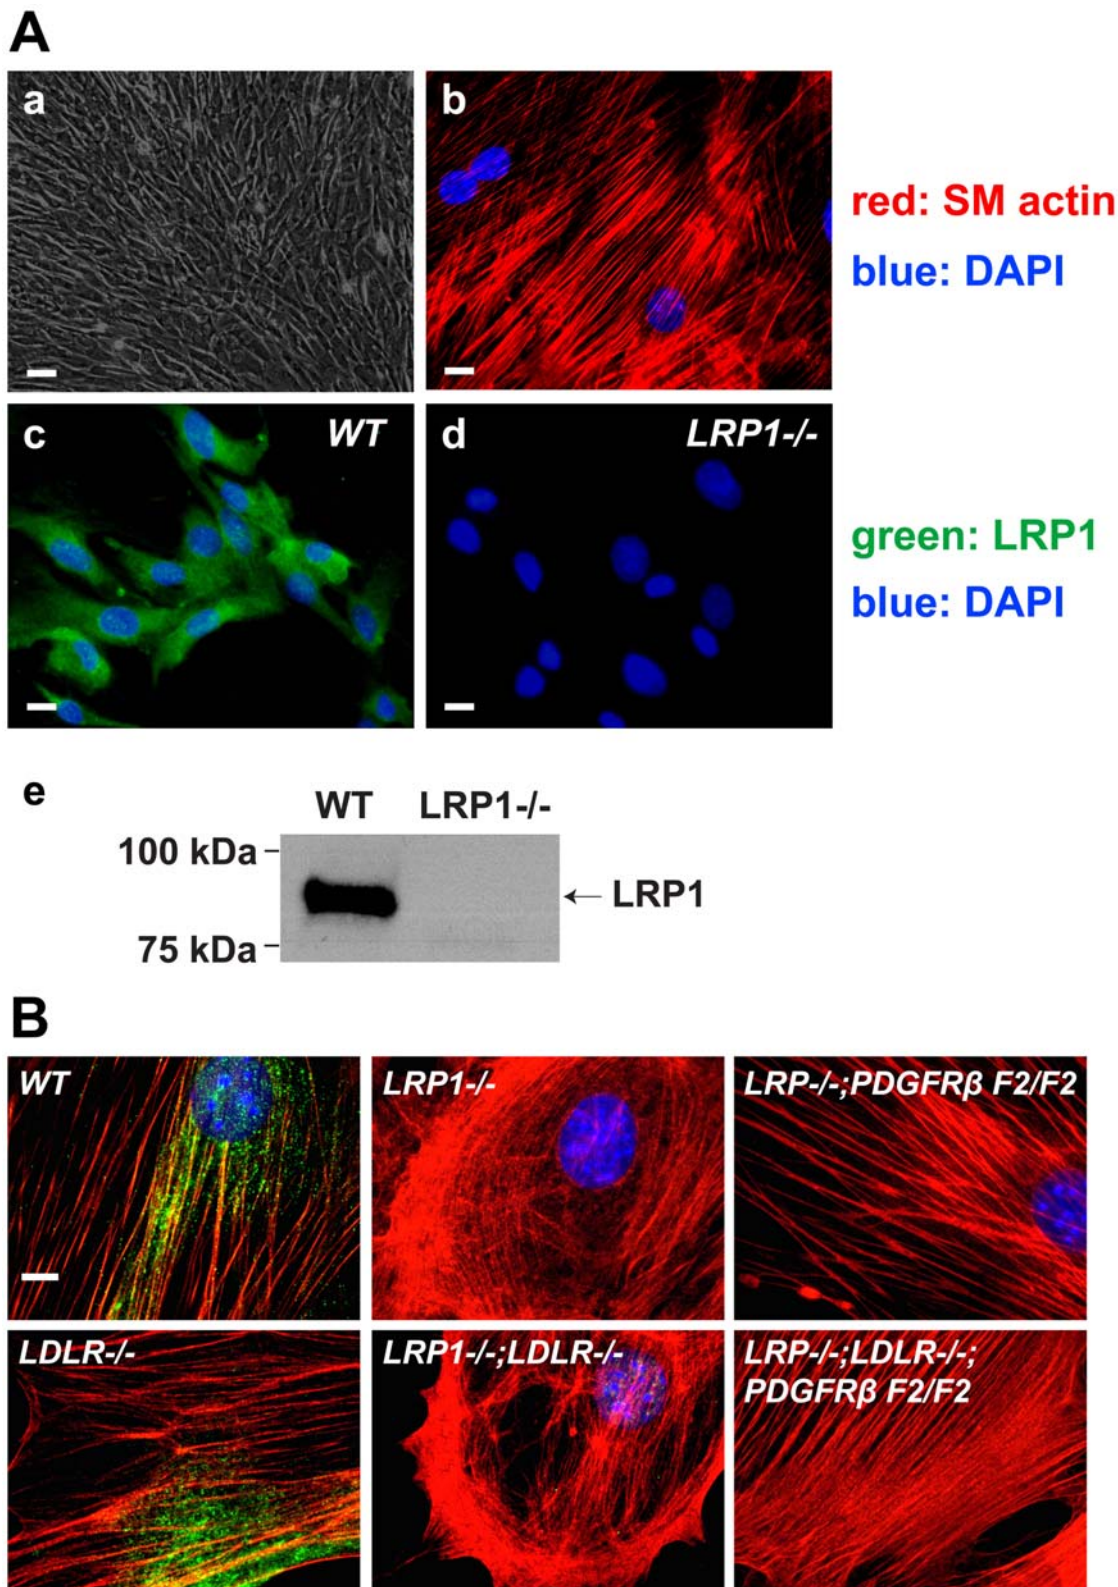

**Figure 4. Disorganization of the actin cytoskeleton in *LRP1*<sup>-/-</sup> SMCs is prevented by blocking PI3K activation by PDGFR $\beta$ .** (A) Primary SMCs generated from mouse aortas. (a) Phase contrast image. Scale bar, 80  $\mu$ m. (b) Immunofluorescence using anti-smooth muscle actin monoclonal antibody (red). Blue: DAPI staining of nuclear DNA. Scale bar, 40  $\mu$ m. (c, d) Detection of LRP1 (green) by immunofluorescence by a rabbit anti-LRP1 polyclonal antibody. Blue: DAPI staining. WT, wild type. Scale bars, 40  $\mu$ m. (e) Immunoblotting was performed to verify the presence or absence of LRP1 protein in the wild type and *LRP1*<sup>-/-</sup> SMCs using the same polyclonal anti-LRP1 antibody. (B) Immunofluorescence of smooth muscle actin (red) in primary SMCs. Actin disorganization in *LRP1*<sup>-/-</sup> and *LRP1*<sup>-/-</sup>; *LDLR*<sup>-/-</sup> SMCs. Normal organization of the actin cytoskeleton is restored in primary PDGFR $\beta$  F2/F2 SMCs. Blue: DAPI. Scale bar: 20  $\mu$ m.  
doi:10.1371/journal.pone.0006922.g004



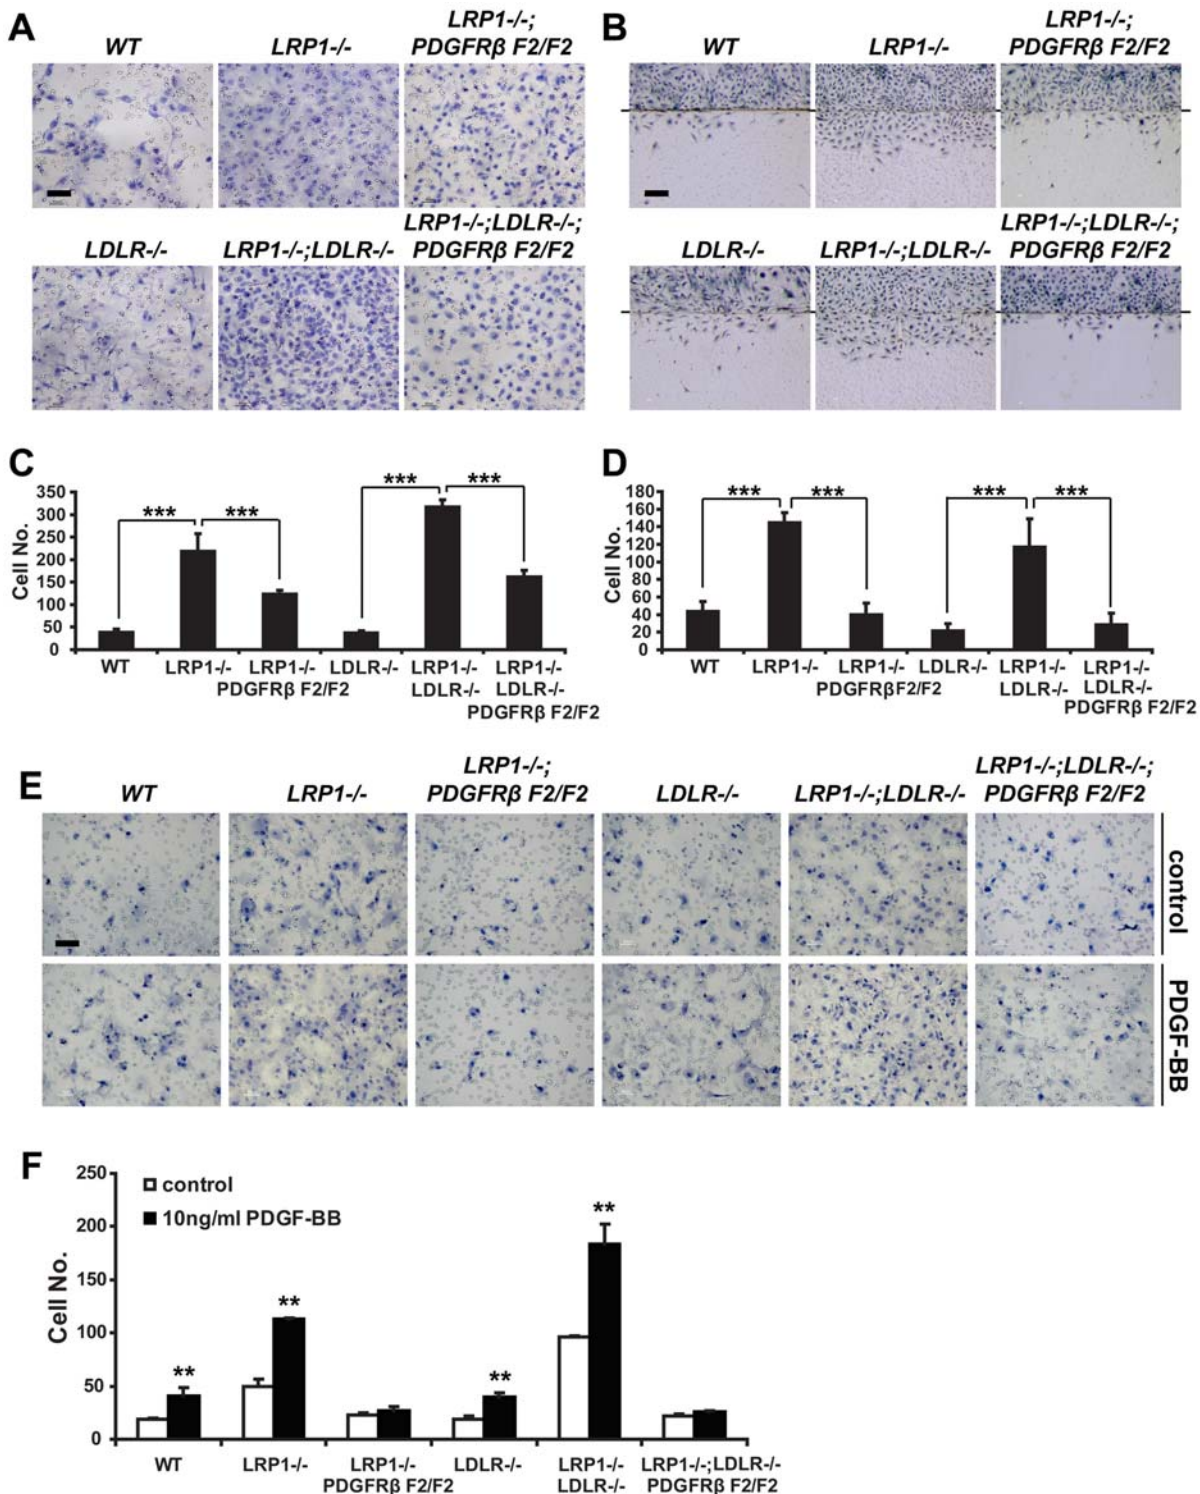

**Figure 5. Primary SMC Migration.** (A) Transwell migration assay. 30,000 SMCs of the indicated genotypes were added to the top compartment of a Boyden chamber. After 6 hours of incubation, the transwell membrane was fixed and stained with hematoxylin. Cells that had migrated through the holes on the membrane to the bottom face were counted. Scale bar, 50  $\mu$ m. (B) Scratch assay. 300,000 SMCs of the indicated genotypes were seeded into 60 mm culture dishes in a medium containing 10  $\mu$ g/ml mitomycin C to prevent cell proliferation and allowed to adhere overnight. The next day, part of the dish was denuded by scratching along a straight line (indicated by a black line behind). Cells were then allowed to migrate into the denuded area for 24 hours prior to fixation and quantification. Scale bar, 50  $\mu$ m. (C, D) Statistical analyses of the Transwell and Scratch migration assays. Results are represented as mean  $\pm$  SD. \*\*\*  $p < 0.001$ . (E) PDGF-BB chemotaxis assay. 10,000 SMCs of the indicated genotypes were added to the top compartment of the Boyden chamber. 10 ng/ml PDGF-BB was added to the lower chamber of the well. After 6 hours of incubation, the transwell membrane was fixed and stained with hematoxylin. The cells that had migrated through the holes on the membrane to the bottom face were counted. Scale bar, 50  $\mu$ m. (F) Statistical analysis of the PDGF-BB chemotaxis assay. Results are represented as mean  $\pm$  SD. \*\*  $p < 0.01$ , \*\*\*  $p < 0.001$ .  $n = 5$  for all assays.

doi:10.1371/journal.pone.0006922.g005

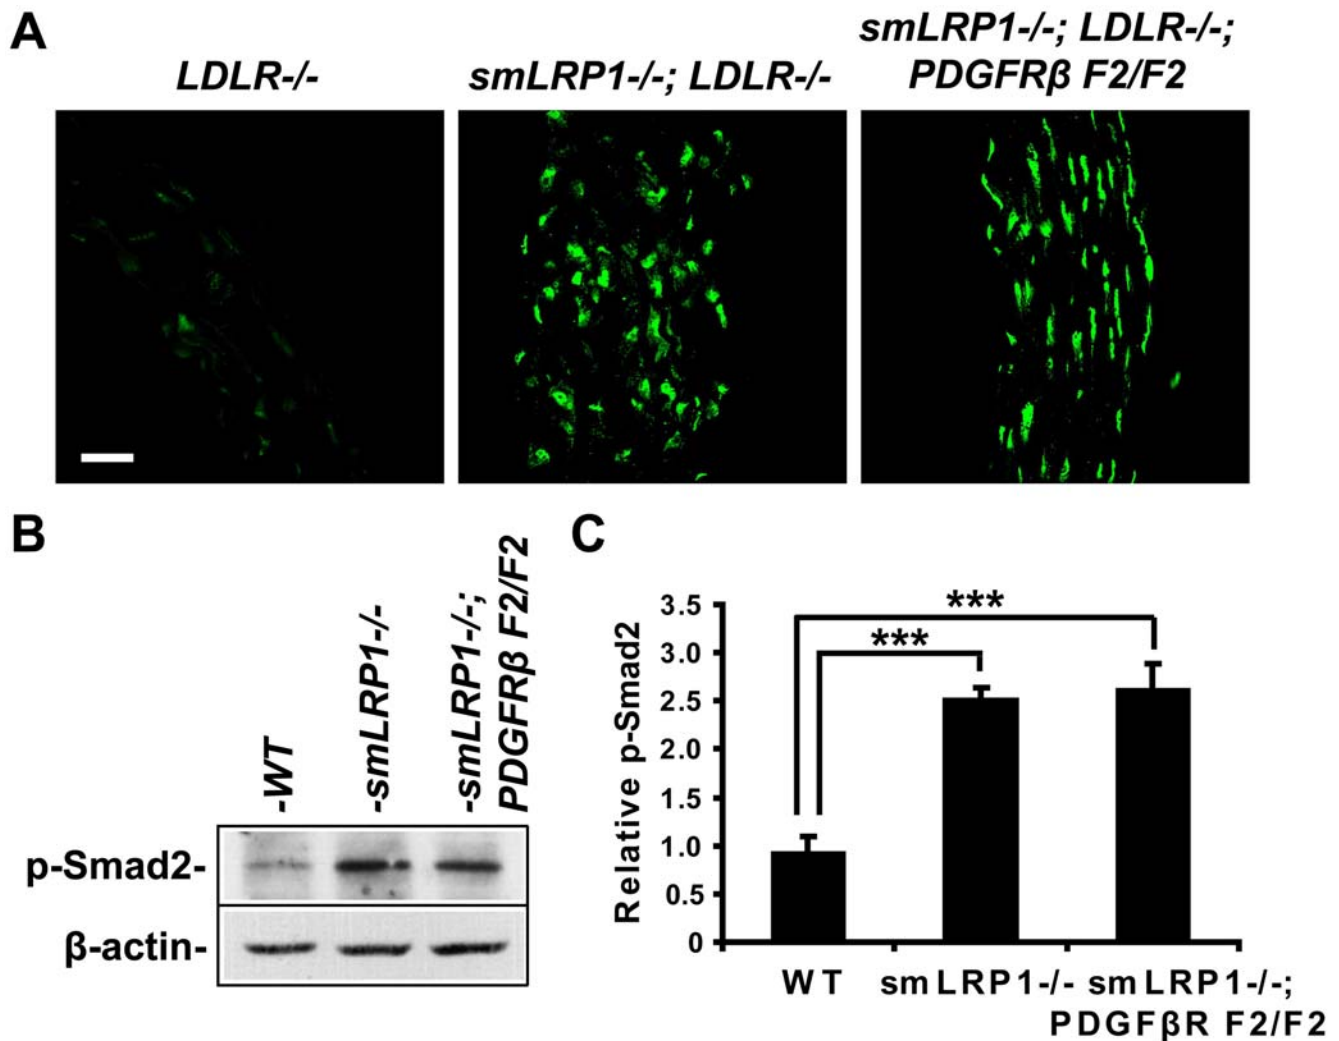

**Figure 6. Increased Smad2 phosphorylation at Ser 465/467 in *smLRP1*<sup>-/-</sup>; *LDLR*<sup>-/-</sup> and *smLRP1*<sup>-/-</sup>; *LDLR*<sup>-/-</sup>; *PDGFRβ* F2/F2 aortas.** (A) Immunofluorescent staining of p-Smad2 (Ser 465/467, green) in aortas of atherosclerosis-free 1-month old mice. Scale bar, 20  $\mu$ m. (B) Immunoblotting of aortic extracts for Smad2 phosphorylation at Ser 465/467.  $\beta$ -actin served as a loading control. (C) The density of p-Smad2 signals was normalized to the corresponding  $\beta$ -actin signals from the same blot and quantified using Image J software (NIH). Densitometric scanning from three independent experiments revealed a statistically significant average of 250%  $\pm$  13% in *smLRP1*<sup>-/-</sup> mice and 260%  $\pm$  29% in *smLRP1*<sup>-/-</sup>; *PDGFRβ* F2/F2 mice, compared with wild type controls (92%  $\pm$  17%). Relative ratio of p-Smad2 in mouse aortas from the indicated genotypes was plotted. Data are presented as mean  $\pm$  SD. \*  $p$  < 0.001,  $n$  = 3. doi:10.1371/journal.pone.0006922.g006

histoanatomically normal despite increased plasma cholesterol levels on the same chow, and extensive atherosclerotic lesions develop only after feeding of a high-cholesterol diet for several months [26]. Thus, LRP1 in SMCs functions cell autonomously in the maintenance of vascular wall integrity and protection from cholesterol-induced atherosclerosis.

In the absence of smLRP1, the mouse aorta undergoes hyperplastic and hypertrophic changes that were apparent in young (7 weeks) as well as older (11 months old) mice indicating that they are not the result of aging, but the manifestation of an intrinsic change of smooth muscle phenotype. This is most likely caused by the increased expression and activation of PDGFR $\beta$  in smLRP1<sup>-/-</sup> mice and an accompanying increase in PI3K association with PDGFR $\beta$ . Disruption of an obligatory proatherogenic proliferative pathway, involving PI3K and PDGFR $\beta$ , prevents or greatly reduces lesion development at sites of high shear stress, such as the aortic arch and the abdominal aorta, where endothelial integrity is easily compromised. Thus, by

selectively controlling SMC proliferation and migration independent of endothelial integrity and plasma cholesterol levels in a novel genetically complex animal model, we have been able to isolate and demonstrate the pivotal and interdependent roles of two central mechanisms of atherosclerotic lesion development.

Activation of the PDGFR $\beta$  results in actin reorganization in the forms of membrane ruffling and chemotaxis [11,27,28,29,30] and thus provides an excellent functional assay for the physiological activation of PDGFR $\beta$  through other genetic manipulations, such as the disruption of LRP1. PI3K binding to the cytoplasmic domain of activated PDGFR $\beta$  receptors requires phosphorylation at residues 739 and 750 and this interaction in turn activates the kinase [18,31]. Replacement of these tyrosines by non-phosphorylatable phenylalanines prevents binding of PI3K and fails to mediate membrane ruffling and cell migration [28,29]. As a result, the pronounced edge ruffling and circular membrane ruffling as well as greatly enhanced SMC migration that were observed in the absence of LRP1 were virtually normalized in mice in which



PDGFR $\beta$ -dependent PI3K activation had been genetically disrupted. These findings show that the membrane ruffling and increased smooth muscle migration in *smLRP1*<sup>-/-</sup> mice is critically dependent upon PI3K activation, which is mediated by PDGFR $\beta$ . Nevertheless, a caveat to this interpretation is that, although PI3K is the only known cellular signal transducer that interacts with pY739 and 750 of PDGFR $\beta$ , this does not exclude the possibility that another unknown signal modulator also interacts with this site and contributes to the pathogenic mechanism.

Marfan syndrome, a disorder of connective tissue architecture with prominent manifestations in the skeletal, ocular and cardiovascular systems, is caused by mutations in the fibrillin-1 gene [21,32] or by loss of function mutations in TGF $\beta$  receptor I or II [24,25]. TGF $\beta$  signaling is abnormally elevated in fibrillin-1-deficient mice [22,23,33] and human aortas [34] as well as TGF $\beta$  receptor I and II deficiency [24]. Previous data from our laboratory have shown nuclear accumulation of phosphorylated Smad2, an indicator of activation of TGF $\beta$  signaling, in the LRP1(T $\beta$ R-V)-deficient vascular wall [15]. In the present study, we have reconfirmed these Marfan syndrome-like phenotypes, including elastic layer disruption, aorta elongation, and aneurysm formation in the presence of increased Smad2 phosphorylation when LRP1 is deficient in the SMCs. These phenotypic manifestations in the vascular wall were essentially abolished in *smLRP1*<sup>-/-</sup>; *PDGFR $\beta$*  *F2/F2* mice, however, the increased phosphorylation and nuclear translocation of Smad2 was not affected by the PDGFR $\beta$  mutations. These findings indicate that TGF $\beta$  activation through LRP1 precedes PDGFR $\beta$ -dependent PI3K signaling, and that activation of TGF $\beta$  signaling by itself is not sufficient to disrupt the vascular wall architecture. PDGFR $\beta$ -dependent PI3K activation appears to be necessary for the expression of the Marfan-like phenotypes. Suppression of PI3K activation by PDGFR $\beta$  prevents the Marfan-like phenotypic changes in the vascular wall in the presence of unabated TGF $\beta$  signaling, suggesting a pivotal role of LRP1-controlled and PDGFR $\beta$ -dependent PI3K activation in the pathogenesis of Marfan syndrome. Selective elimination of PDGFR $\beta$ -dependent PI3K activation thus could be a potential therapeutic target for both atherosclerosis and Marfan syndrome.

In conclusion, the current study reveals a novel PI3K-dependent mechanism by which LRP1 is essential for controlling the integrity of the vascular wall, and by which this multifunctional receptor potently protects against atherosclerosis and Marfan syndrome. The findings we have presented here shed new light on the molecular mechanisms that control cellular growth and migration, and which are thereby essential to the remodeling and repair of the vascular wall and for slowing or preventing degenerative disorders of the vascular wall.

## Materials and Methods

### Generation of the mouse strains

All experimental mice were maintained on a mixed C57BL/6/129 background. Transgenic mice expressing Cre recombinase specifically in smooth muscle cells (SM22 Cre) mated with *LRP1* *loxP/loxP* mice to generate *smLRP1*<sup>-/-</sup> mice. Similarly, *smLRP1*<sup>-/-</sup>; *LDLR*<sup>-/-</sup> and *smLRP1*<sup>-/-</sup>; *LDLR*<sup>-/-</sup>; *PDGFR $\beta$*  *F2/F2* mouse strains were established. Paired littermates were utilized throughout the study.

### Animal & aorta preparation

Experiments were performed according to protocols approved by the Institutional Committee for Use and Care of Laboratory Animals. All animals were maintained on standard rodent chow

(Teklad 6% fat) with water *ad libitum*. Mice were sacrificed and blood samples were collected for lipid analysis following a six-hour fasting period. Aortas were removed intact from the root of the aortic arch to the iliac bifurcation and preserved in 4% paraformaldehyde (PFA) for conventional morphological study.

### Oil Red O staining

Aortas were opened longitudinally under a dissecting microscope (Model Z30L, Cambridge Instruments). After fixation in 4% PFA, tissues were stained with 0.05% Oil Red O (s1848, Poly Scientific) at 60°C for 30 min. The aortas were then rinsed twice with 85% propylene glycol to develop the color.

**Hematoxylin-eosin (H&E), Masson's Trichrome and Hart's Elastin stainings** were performed according to established textbook methods [35,36].

### Aortic extract preparation and Western blotting (WB)

The fat and connective tissue of the aorta were removed carefully. The aorta was homogenized in RIPA buffer with Proteinase Inhibitor Cocktail (P8430, Sigma) and Phosphatase Inhibitor Cocktail II (P5726, Sigma) to inhibit tyrosine protein phosphatases. After centrifugation at 20,000 xg for 30 minutes at 4°C, the supernatant was applied for Western blotting and the pellet was discarded.

Briefly, aortic extract was resolved on SDS-PAGE gel and transferred to nitrocellulose membranes (HybondTM-C Extra, RPN303 E, Amersham Biosciences). Blots were blocked with 5% skim milk, probed with the appropriate primary antibodies ( $\alpha$ -PDGFR $\beta$ : #06-498, Upstate;  $\alpha$ -p-Erk1/2: #9101, Cell Signaling;  $\alpha$ -LRP1: 377, Herz Lab;  $\alpha$ -TGF $\beta$ R2: #06-227, Upstate;  $\alpha$ -p-Smad2, #3108, Cell signaling) and then incubated with horseradish peroxidase-conjugated anti-rabbit secondary antibody (NA934V, Amersham Biosciences). Immunoreactive bands were visualized using an enhanced chemiluminescence Western blotting detection kit (RPN 2132, Amersham Biosciences).

### Co-immunoprecipitation

Aorta extracts were prepared as described above but using immunoprecipitation (IP) lysis buffer (50 mM Tris pH 7.4, 150 mM NaCl, 0.5% NP-40) instead of RIPA buffer.

Protein extract was pre-cleared with irrelevant non-immune serum. Nonspecific binding was precipitated with pre-swollen protein A-Agarose beads (P3476, Sigma). Supernatant was harvested by short spin and the appropriate specific primary antibodies were applied ( $\alpha$ -PDGFR $\beta$ : #06-498, Upstate;  $\alpha$ -p-Tyrosine: #05-321, Upstate). The suspension was probed at 4°C for 2 hours and then precipitated again with protein A-Agarose beads. The antigen-antibody-protein A Agarose complex was collected by a brief centrifugation, washed three times with a solution containing 50 mM Tris pH 7.4, 150 mM NaCl, 0.1% NP-40 and then three times with the same buffer without NP-40. The washed antigen-antibody-protein A Agarose complex was resolved on SDS-PAGE gel and immunoblotted with the relevant antibodies ( $\alpha$ -p-Tyrosine: #05-321, Upstate;  $\alpha$ -PI3K-p85: #06-496/#05-217, Upstate;  $\alpha$ -PDGFR $\beta$ : #06-498, Upstate;  $\alpha$ -LRP1: 377, Herz Lab;  $\alpha$ -actin: A4700, Sigma).

### Primary SMC culture

Mouse primary SMC culture was established using the explant technique as previously described [37,38]. All aortas were obtained from 8-week old male mice. Briefly, the aorta was dissected under sterile conditions, rinsed with PBS containing antibiotics, and the connective tissue and adventitia were removed

carefully. The aorta was opened longitudinally and the intima was scraped on luminal surface. Then the aorta was minced into small pieces and placed into a T25 flask with high glucose (4.5 g/L) DMEM containing 15% FCS, 100 U/ml penicillin, 100 mg/ml streptomycin, 20 mM L-glutamine. Both explants and cells were cultured at 37°C in 5% carbon dioxide (CO<sub>2</sub>). Cells were detached by incubation with 0.25% trypsin-EDTA solution. Passages 5–15 were used in this study.

### Immunocytochemistry

Subcultured SMCs from the mouse aortic explants were allowed to grow on glass coverslips for 24 hours after trypsinization. The cells were fixed *in situ* with 95% ethanol, blocked with 5% non-immune goat serum, and probed with anti- $\alpha$ -smooth muscle actin (A2547, Sigma) and LRP1 (377, Herz Lab) antibodies. After three washes in PBS, the cells were incubated with Alexa Fluor 594 goat anti-mouse (A11032, Molecular Probes) and Alexa Fluor 488 goat anti-rabbit IgG antibodies (A11034, Molecular Probes). After three more washes in PBS, coverslips were mounted on glass slides using a DAPI-containing mounting medium (Vectashield<sup>R</sup> Hard Set<sup>TM</sup>, H-1500, Vector) and analyzed using a fluorescence microscope (Axioplan 2 Imaging, Carl Zeiss MicroImaging Inc.).

### Boyden chamber transmigration assay

SMC migration was measured using a 12-well modified Boyden chamber (AA12, Neuro Probe) hosting a polycarbonate filter with 8- $\mu$ m pores (PFB8, Neuro Probe) as described [39].  $3 \times 10^4$  cells in 100  $\mu$ l were loaded into the top chamber of each well while the lower chambers were filled with SMC medium. After incubating at 37°C in 5% CO<sub>2</sub> for 6 hours, non-migrated cells were scraped from the upper surface of the filter. Cells on the lower surface were fixed with 95% ethanol and stained with Harris Modified Hematoxylin (HHS-16, Sigma). The number of SMCs on the lower surface of the filter was determined by counting five continuous high-power (200 $\times$ ) fields of constant area per well. Experiments were performed three times in duplicate wells.

### Two-dimensional migration (scratch) assay

Subcultured  $3 \times 10^5$  SMCs were seeded into 60 mm Petri dishes. 10  $\mu$ g/ml mitomycin C was applied to inhibit cell proliferation. Cells were incubated at 37°C in 5% CO<sub>2</sub> overnight. The next day, part of the dish was denuded by scratching along a straight line. The dishes were put back to the incubator for 24 hours. The cells which appeared on the denuded area were treated as migrated cells. To quantify the migrated cells, the cells in five continuous high-power (200 $\times$ ) fields were counted and statistical analysis was performed.

### References

- Herz J, Strickland DK (2001) LRP: a multifunctional scavenger and signaling receptor. *J Clin Invest* 108: 779–784.
- Lillis APVDL, Murphy-Ullrich JE, Strickland DK (2008) LDL receptor-related protein 1: unique tissue-specific functions revealed by selective gene knockout studies. *Physiol Rev* 88: 887–918.
- Beisiegel U, Weber W, Ihrke G, Herz J, Stanley KK (1989) The LDL-receptor-related protein, LRP, is an apolipoprotein E-binding protein. *Nature* 341: 162–164.
- Kowal RC, Herz J, Goldstein JL, Esser V, Brown MS (1989) Low density lipoprotein receptor-related protein mediates uptake of cholesteryl esters derived from apoprotein E-enriched lipoproteins. *Proc Natl Acad Sci U S A* 86: 5810–5814.
- Hussain MM, Maxfield FR, Mas-Oliva J, Tabas I, Ji ZS, et al. (1991) Clearance of chylomicron remnants by the low density lipoprotein receptor-related protein/ $\alpha$  2-macroglobulin receptor. *J Biol Chem* 266: 13936–13940.
- Swertfeger DK, Bu G, Hui DY (2002) Low density lipoprotein receptor-related protein mediates apolipoprotein E inhibition of smooth muscle cell migration. *J Biol Chem* 277: 4141–4146.
- Boucher P, Gotthardt M, Li WP, Anderson RG, Herz J (2003) LRP: role in vascular wall integrity and protection from atherosclerosis. *Science* 300: 329–332.
- Tallquist M, Kazlauskas A (2004) PDGF signaling in cells and mice. *Cytokine Growth Factor Rev* 15: 205–213.
- Okkenhaug K, Vanhaesebroeck B (2001) New responsibilities for the PI3K regulatory subunit p85  $\alpha$ . *Sci STKE* 2001: PE1.
- Arrieumerlou C, Donnadieu E, Brennan P, Keryer G, Bismuth G, et al. (1998) Involvement of phosphoinositide 3-kinase and Rac in membrane ruffling induced by IL-2 in T cells. *Eur J Immunol* 28: 1877–1885.
- Brachmann SM, Yballe CM, Innocenti M, Deane JA, Fruman DA, et al. (2005) Role of phosphoinositide 3-kinase regulatory isoforms in development and actin rearrangement. *Mol Cell Biol* 25: 2593–2606.
- Cantley LC (2002) The phosphoinositide 3-kinase pathway. *Science* 296: 1655–1657.
- Huang SS, Ling TY, Tseng WF, Huang YH, Tang FM, et al. (2003) Cellular growth inhibition by IGFBP-3 and TGF- $\beta$ 1 requires LRP-1. *Faseb J* 17: 2068–2081.

### PDGF-BB chemotaxis assay

This experiment was performed as described above in the Boyden chamber transmigration assay with the exception that only  $1 \times 10^4$  cells were seeded. In addition, 10 ng/ml PDGF-BB was administered to the lower chambers as an attractant.

### Immunohistochemistry

Aortas were isolated and fixed in 4% PFA for 1 hour. The tissues were sliced into 8  $\mu$ m cross sections after embedded in OCT. The mounted sections were treated with 0.1% Triton X-100 for 5 minutes, blocked with 5% non-immune goat serum, and probed with anti-p-Smad2 (#3108, Cell signaling) rabbit antibody. After three washes in PBS, the sections were incubated with Alexa Fluor 488 goat anti-rabbit IgG antibodies (A11034, Molecular Probes). After three more washes in PBS, coverslips were mounted on glass slides with a DAPI-containing mounting medium (ProLong Gold antifade reagent with DAPI, P36935, Invitrogen).

### Statistical analysis

Statistical analyses were performed using two-tail Student's t-test. Results are given as mean  $\pm$  SD. A  $p < 0.05$  was considered significant.

### Supporting Information

**Figure S1** Plasma Lipoprotein Profile. A significant increase of LDL-cholesterol was observed in LDLR $-/-$  and smLRP1 $-/-$ ; LDLR $-/-$  mice. LRP1-deficiency in smooth muscle cells had no effect on the plasma lipoprotein profile.

Found at: doi:10.1371/journal.pone.0006922.s001 (1.21 MB TIF)

**Figure S2** Light microscopy of cryostat sections. Aortas of 7-week old mice were dissected out. 8  $\mu$ m-thick cryostat sections were stained with DAPI. Aortic wall thickening was observed in smLRP1 $-/-$  mice.

Found at: doi:10.1371/journal.pone.0006922.s002 (4.56 MB TIF)

### Acknowledgments

We thank John Shelton for excellent assistance in photography. We also thank Wenling Niu, Isaac Rocha and Elida Priscilla Rodriguez for their helpful technical support.

### Author Contributions

Conceived and designed the experiments: LZ YT JH. Performed the experiments: LZ YT. Analyzed the data: LZ PB MDT JH. Contributed reagents/materials/analysis tools: LZ YT PB MDT JH. Wrote the paper: LZ JH.

14. Tseng WF, Huang SS, Huang JS (2004) LRP-1/TbetaR-V mediates TGF-beta1-induced growth inhibition in CHO cells. *FEBS Lett* 562: 71–78.
15. Boucher P, Li WP, Matz RL, Takayama Y, Auwerx J, et al. (2007) LRP1 functions as an atheroprotective integrator of TGFbeta and PDGF signals in the vascular wall: implications for Marfan syndrome. *PLoS ONE* 2: e448.
16. Kundra V, Escobedo JA, Kazlauskas A, Kim HK, Rhee SG, et al. (1994) Regulation of chemotaxis by the platelet-derived growth factor receptor-beta. *Nature* 367: 474–476.
17. DeMali KA, Whiteford CC, Ulug ET, Kazlauskas A (1997) Platelet-derived growth factor-dependent cellular transformation requires either phospholipase Cgamma or phosphatidylinositol 3 kinase. *J Biol Chem* 272: 9011–9018.
18. Heuchel R, Berg A, Tallquist M, Ahlen K, Reed RK, et al. (1999) Platelet-derived growth factor beta receptor regulates interstitial fluid homeostasis through phosphatidylinositol-3' kinase signaling. *Proc Natl Acad Sci U S A* 96: 11410–11415.
19. Koumnas MZ, Morris RE, Thompson MR, FitzGerald DJ, Strickland DK, et al. (1992) The alpha 2-macroglobulin receptor/low density lipoprotein receptor-related protein binds and internalizes *Pseudomonas* exotoxin A. *J Biol Chem* 267: 12420–12423.
20. Willnow TE, Herz J (1994) Genetic deficiency in low density lipoprotein receptor-related protein confers cellular resistance to *Pseudomonas* exotoxin A. Evidence that this protein is required for uptake and degradation of multiple ligands. *J Cell Sci* 107 (Pt 3): 719–726.
21. Robinson PN, Arteaga-Solis E, Baldock C, Collod-Beroud G, Booms P, et al. (2006) The molecular genetics of Marfan syndrome and related disorders. *J Med Genet* 43: 769–787.
22. Neptune ER, Frischmeyer PA, Arking DE, Myers L, Bunton TE, et al. (2003) Dysregulation of TGF-beta activation contributes to pathogenesis in Marfan syndrome. *Nat Genet* 33: 407–411.
23. Ng CM, Cheng A, Myers LA, Martinez-Murillo F, Jie C, et al. (2004) TGF-beta-dependent pathogenesis of mitral valve prolapse in a mouse model of Marfan syndrome. *J Clin Invest* 114: 1586–1592.
24. Singh KK, Rommel K, Mishra A, Karck M, Haverich A, et al. (2006) TGFBR1 and TGFBR2 mutations in patients with features of Marfan syndrome and Loeys-Dietz syndrome. *Hum Mutat* 27: 770–777.
25. Akutsu K, Morisaki H, Takeshita S, Sakamoto S, Tamori Y, et al. (2007) Phenotypic heterogeneity of Marfan-like connective tissue disorders associated with mutations in the transforming growth factor-beta receptor genes. *Circ J* 71: 1305–1309.
26. Ishibashi S, Brown MS, Goldstein JL, Gerard RD, Hammer RE, et al. (1993) Hypercholesterolemia in low density lipoprotein receptor knockout mice and its reversal by adenovirus-mediated gene delivery. *J Clin Invest* 92: 883–893.
27. Arvidsson AK, Heldin CH, Claesson-Welsh L (1992) Transduction of circular membrane ruffling by the platelet-derived growth factor beta-receptor is dependent on its kinase insert. *Cell Growth Differ* 3: 881–887.
28. Wennstrom S, Hawkins P, Cooke F, Hara K, Yonezawa K, et al. (1994) Activation of phosphoinositide 3-kinase is required for PDGF-stimulated membrane ruffling. *Curr Biol* 4: 385–393.
29. Wennstrom S, Siegbahn A, Yokote K, Arvidsson AK, Heldin CH, et al. (1994) Membrane ruffling and chemotaxis transduced by the PDGF beta-receptor require the binding site for phosphatidylinositol 3' kinase. *Oncogene* 9: 651–660.
30. Hooshmand-Rad R, Claesson-Welsh L, Wennstrom S, Yokote K, Siegbahn A, et al. (1997) Involvement of phosphatidylinositol 3'-kinase and Rac in platelet-derived growth factor-induced actin reorganization and chemotaxis. *Exp Cell Res* 234: 434–441.
31. Tallquist MD, Klinghoffer RA, Heuchel R, Muetting-Nelsen PF, Corrin PD, et al. (2000) Retention of PDGFR-beta function in mice in the absence of phosphatidylinositol 3'-kinase and phospholipase Cgamma signaling pathways. *Genes Dev* 14: 3179–3190.
32. Ramirez F, Dietz HC (2007) Marfan syndrome: from molecular pathogenesis to clinical treatment. *Curr Opin Genet Dev* 17: 252–258.
33. Habashi JP, Judge DP, Holm TM, Cohn RD, Loeys BL, et al. (2006) Losartan, an AT1 antagonist, prevents aortic aneurysm in a mouse model of Marfan syndrome. *Science* 312: 117–121.
34. Nataatmadja M, West J, West M (2006) Overexpression of transforming growth factor-beta is associated with increased hyaluronan content and impairment of repair in Marfan syndrome aortic aneurysm. *Circulation* 114: I371–377.
35. Sheehan DC, Hrapchak BB (1987) *Theory and Practice of Histotechnology: Battelle*.
36. Woods AE, Ellis RC (1995) *Histopathology, A Complete Reference: Churchill Livingstone*.
37. Yu M, Gu SM, Zhou L, Zhao GF, Yu LQ, et al. (2003) [Molecular basis of preventive effect of human apolipoprotein-I on murine vascular smooth muscle cell proliferation and lipid deposition induced by oxidized low density lipoprotein]. *Zhonghua Yi Xue Za Zhi* 83: 494–497.
38. Zhou L, Dong J, Yu M, Yin H, She M (2003) Age-dependent increase of NF-kappaB translocation and PDGF-B expression in aortic endothelial cells of hypercholesterolemic rats. *Exp Gerontol* 38: 1161–1168.
39. Bornfeldt KE, Raines EW, Nakano T, Graves LM, Krebs EG, et al. (1994) Insulin-like growth factor-I and platelet-derived growth factor-BB induce directed migration of human arterial smooth muscle cells via signaling pathways that are distinct from those of proliferation. *J Clin Invest* 93: 1266–1274.
